# Supplementary material for: Toxic Metal and Essential Element Concentrations in the Blood and Tissues of Pancreatic Ductal Adenocarcinoma Patients
Source: MDPI journal article supplement (doi:10.3390/toxics12010032), 2024-01-01
Supplement: s1 [file s1]

## SUPPLEMENTARY MATERIALS

### **Methodologies for concentration of toxic metals and essential elements in blood and tissues of patients with Pancreatic Ductal Adenocarcinoma**

Quantification of Cd, Cr, Cu, Fe, Mn, Ni, Se, Pb and Zn in whole blood and tissue was performed by iCAP Qc ICP-MS (Inductively Coupled Plasma-Mass Spectrometry). To reduce polyatomic interferences on analytical masses, the He pressurized QCell in Kinetic Energy Discrimination (KED) mode was used for the quantification of elements. ICP-MS instrumental characteristics and settings are reported in Table S1. Quantification was performed by the addition calibration method, and multi-calibration curves were prepared using pooled digested samples and mono-elemental reference standards (CPAChem, Bogomilovo, Bulgaria). Rhodium as internal standard was added at 1 ng/ml in the analytical solutions to account for possible instrumental drifts, and certified reference materials (CRMs) (i.e., ClinChek® Whole Blood Control Level I, pig kidney ERM-BB186, and mussel tissue ERM-CE278k) were analysed to evaluate method recovery and precision (Tables S2-S4). Method limits of detection (LoDs) were calculated as three times the standard deviation of replicated measurements of pooled digested samples. The following LoDs were obtained in whole blood: Cd, 0.03 ng/ml; Co, 0.02 ng/ml; Cr, 0.05 ng/ml; Cu, 100 ng/ml; Fe, 10 µg/ml; Mn, 0.4 ng/ml; Ni, 0.1 ng/ml; Pb, 0.5 ng/ml; Se, 10 ng/ml; Zn, 0.15 µg/ml; whilst, LoDs in tissues were as follows: Cd, 3 ng/g; Co, 0.1 ng/g; Cr, 1 ng/g; Cu, 40 ng/g; Fe, 2.5 µg/g; Mn, 3 ng/g; Ni, 2.5 ng/g; Pb, 1 ng/g; Se, 3 ng/g; Zn, 0.3 µg/g. For both matrices, procedural blanks were analysed to control for possible exogenous metals contamination from plastics and reagents.

**Table S1.** ICP-MS instrumental characteristics and settings.

|                            |                                                                                                                                                                                        |
|----------------------------|----------------------------------------------------------------------------------------------------------------------------------------------------------------------------------------|
| <b>Spectrometer</b>        | iCAP Qc ICP-MS (Thermo Scientific, Bremen, Germany)                                                                                                                                    |
| <b>Rf power</b>            | 1550 W                                                                                                                                                                                 |
| <b>Interface</b>           | Sampler and skimmer cones in Ni                                                                                                                                                        |
| <b>Nebulizer</b>           | Cross flow                                                                                                                                                                             |
| <b>Expansion chamber</b>   | Cyclonic                                                                                                                                                                               |
| <b>Argon flow</b>          | Plasma, 14 L/min; Nebulizer, 1.07 L/min; Auxiliary, 0.8 L/min                                                                                                                          |
| <b>Data acquisition</b>    | 3 runs, 15 passes                                                                                                                                                                      |
| <b>Extraction lens</b>     | -76.4 V                                                                                                                                                                                |
| <b>CCT Focus lens</b>      | -3.72 V                                                                                                                                                                                |
| <b>Focus lens</b>          | -8.50 V                                                                                                                                                                                |
| <b>Analyzing mode</b>      | Kinetic Energy Discrimination (KED)                                                                                                                                                    |
| <b>Collisional He flow</b> | 4 ml/min                                                                                                                                                                               |
| <b>Analytical masses</b>   | <sup>114</sup> Cd, <sup>52</sup> Cr, <sup>63</sup> Cu, <sup>56</sup> Fe, <sup>55</sup> Mn, <sup>60</sup> Ni, <sup>82</sup> Se, <sup>208</sup> Pb and <sup>64</sup> Zn, all in KED mode |
| <b>Internal standard</b>   | <sup>103</sup> Rh                                                                                                                                                                      |

**Table S2.** Results of CRM ClinChek® Whole Blood Control, Level I (Recipe, Munich, Germany) analysis.

| <b>Elements</b> | <b>Certified (Range)</b> | <b>Found (%)</b> |
|-----------------|--------------------------|------------------|
| Cd (ng/ml)      | 1.58 (1.18-1.97)         | 1.42 (90)        |
| Cr(ng/ml)       | 2.23 (1.67-2.78)         | 2.12 (95)        |
| Cu (ng/ml)      | 738 (590-885)            | 790 (107)        |
| Fe (µg/ml)      | 345 (276-414)            | 352 (102)        |
| Mn (ng/ml)      | 7.90 (6.32-9.48)         | 7.27 (92)        |
| Ni (ng/ml)      | 2.10 (1.58-2.63)         | 2.31 (110)       |
| Pb (ng/ml)      | 37.6 (30.1-45.2)         | 39.1 (104)       |
| Se (ng/ml)      | 83.1 (66.5-99.7)         | 80.6 (97)        |
| Zn (ng/ml)      | 4430 (3550-5320)         | 4784 (108)       |

**Table S3.** Results of CRM pig kidney ERM-BB186 (IRMM, Geel, Belgium) analysis.

| <b>Elements</b> | <b>Certified <math>\pm</math> Uncertainty</b> | <b>Found (%)</b> |
|-----------------|-----------------------------------------------|------------------|
| Cd (mg/kg)      | $1.09 \pm 0.05$                               | 1.06 (97)        |
| Cu (mg/kg)      | $36.5 \pm 1.8$                                | 37.6 (103)       |
| Fe (mg/kg)      | $255 \pm 13$                                  | 271 (106)        |
| Mn (mg/kg)      | $7.26 \pm 0.25$                               | 6.97 (96)        |
| Pb (mg/kg)      | $0.040 \pm 0.005$                             | 0.037 (94)       |
| Se (mg/kg)      | $10.3 \pm 0.9$                                | 11.5 (112)       |
| Zn (mg/kg)      | $134 \pm 5$                                   | 132 (99)         |

**Table S4.** Results of CRM mussel tissue ERM-CE278k (IRMM, Geel Belgium) analysis.

| <b>Elements</b> | <b>Certified <math>\pm</math> Uncertainty</b> | <b>Found (%)</b> |
|-----------------|-----------------------------------------------|------------------|
| Cd (mg/kg)      | $0.336 \pm 0.025$                             | 0.342 (102)      |
| Cr (mg/kg)      | $0.730 \pm 0.22$                              | 0.715 (98)       |
| Cu (mg/kg)      | $5.98 \pm 0.27$                               | 5.74 (96)        |
| Fe (mg/kg)      | $161 \pm 8$                                   | 156 (97)         |
| Mn (mg/kg)      | $4.88 \pm 0.24$                               | 5.27 (108)       |
| Ni (mg/kg)      | $0.69 \pm 0.15$                               | 0.81 (117)       |
| Pb (mg/kg)      | $2.18 \pm 0.18$                               | 2.41 (107)       |
| Se (mg/kg)      | $1.62 \pm 0.12$                               | 2.11 (97)        |
| Zn (mg/kg)      | $71 \pm 4$                                    | 73 (103)         |
